# Supplementary material for: Host Retromer Protein Sorting Nexin 2 Interacts with Human Respiratory Syncytial Virus Structural Proteins and is Required for Efficient Viral Production
Source: PubMed Central journal article supplement (PMC7527724; doi:10.1128/mbio.01869-20), 2020-09-29

Supplementary Figure 2.

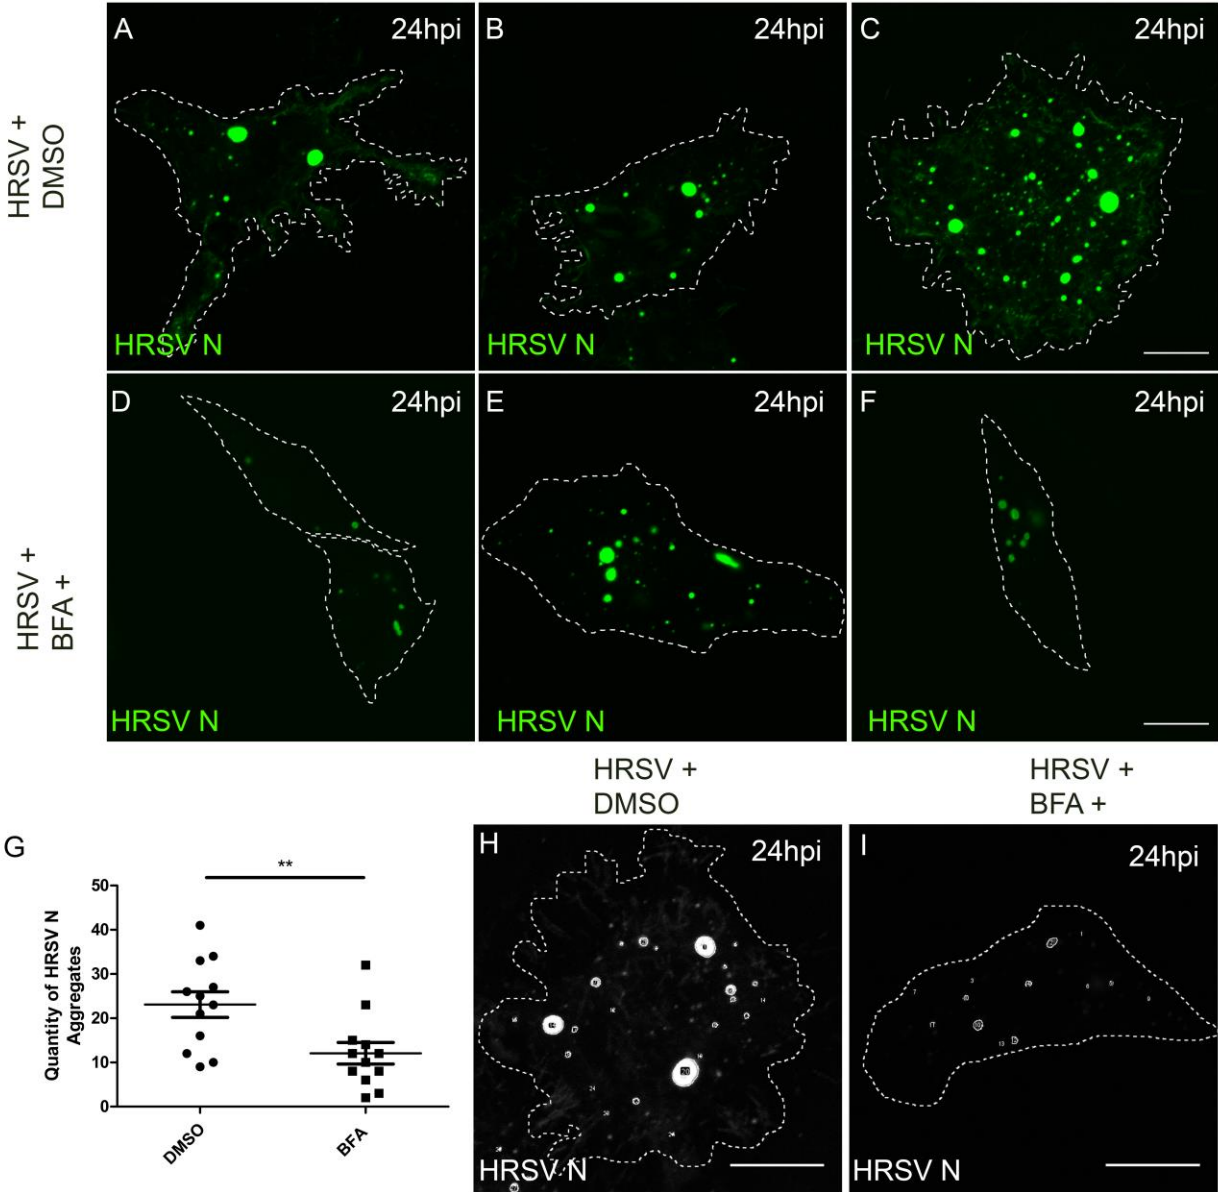

Supplement: mBio.01869-20-sf002.pdf [file mBio.01869-20-sf002.pdf]
